# Supplementary material
Source: Research Square preprint supplement (doi:10.21203/rs.3.rs-9887536/v1)
Supplement: Supplementary file 1 [file 0af1907ea49a4fc677ea299a.docx]

**Supplementary Material 1.**

**General Information Questionnaire**

1. Sex：Male  Female
2. Age______________
3. Education level Primary school

Junior school

Senior school

College degree

1. Payment method Urban Employee Basic Medical Insurance

Urban Resident Basic Medical Insurance

Rural Medical Insurance

Self-paid

1. Average monthly income per capita ＜3000

3000~5000

＞5000

1. Tumor location Lip cancer

Tongue cancer

Buccal cancer

Gingival cancer

Hard palate cancer

Floor of mouth cancer

Other

7.Treatment method Wide local excision

Wide local excision + neck lymph node

Dissection Island flap

Free flap

8.Tooth defect NO  YES

9.First diagnosis NO  YES

10.Primary caregiver Spouse

Children

Parents

Caregiver

Other

11.Lip split NO  YES

12.Racheotomy NO  YES
